# Supplementary material for: New Gall-Forming Insect Model, <em>Smicronyx madaranus</em>: Critical Stages for Gall Formation, Phylogeny, and Effectiveness of Gene Functional Analysis
Source: Preprints.org preprint supplement (doi:10.20944/preprints202312.0661.v1), 2023-12-11
Supplement: Supplementary file 4 [file supplementary]

**Table S1** Weevil samples used in this study

| Species                              | Locality (Collector <sup>a</sup> )        | Sample code <sup>b</sup> | Insect life stage<br>(Host plant <sup>c</sup> ) | Sampling date | Accession<br>number |
|--------------------------------------|-------------------------------------------|--------------------------|-------------------------------------------------|---------------|---------------------|
| <b><i>Smicronyx dentirostris</i></b> |                                           |                          |                                                 |               |                     |
|                                      | Notsuharu, Oita, Oita (YT)                | Sd_Oita 1                | Adult (Cj)                                      | 2019-08-11    | LC778267            |
|                                      |                                           | Sd_Oita 2                | Adult (Cj)                                      | 2019-08-11    | LC778268            |
| <b><i>Smicronyx japonicus</i></b>    |                                           |                          |                                                 |               |                     |
|                                      | Shimizu, Shizuoka, Shizuoka (HH)          | Sj_Shizuoka 1            | Adult (Cca)                                     | 2019-08-03    | LC778264            |
|                                      |                                           | Sj_Shizuoka 2            | Adult (Cch)                                     | 2019-08-03    | LC778265            |
|                                      | Nakayama, Tahara, Aichi (TW)              | Sj_Tahara                | Adult (Cca)                                     | 2019-09-02    | LC778266            |
| <b><i>Smicronyx madaranus</i></b>    |                                           |                          |                                                 |               |                     |
|                                      | Shinya, Akita, Akita (TW)                 | Sm_Akita                 | Larva (Cca)                                     | 2018-06-23    | LC778256            |
|                                      | Iwase-Koshi, Toyama, Toyama (TT, RM)      | Sm_Toyama                | Larva (Cca)                                     | 2018-06-27    | LC778254            |
|                                      | Minami, Fuchu, Tokyo (TT)                 | Sm_Fuchu                 | Larva (Cca)                                     | 2018-07-07    | LC778255            |
|                                      | Nachikatsuura, Higashimuro, Wakayama (TW) | Sm_Higashimuro           | Larva (Cca)                                     | 2018-06-24    | LC778257            |
|                                      | Fukube, Tottori, Tottori (TW)             | Sm_Tottori               | Larva (Cca)                                     | 2018-07-15    | LC778253            |
| <b><i>Smicronyx rubricatus</i></b>   |                                           |                          |                                                 |               |                     |
|                                      | Shiramine, Hakusan, Ishikawa (HK)         | Sr_Hakusan 1             | Adult (Cj)                                      | 2019-08-25    | LC778258            |
|                                      |                                           | Sr_Hakusan 2             | Adult (Cj)                                      | 2019-08-25    | LC778263            |
|                                      | Shioya, Kaga, Ishikawa (HK)               | Sr_Kaga 1                | Adult (Cj)                                      | 2019-07-17    | LC778260            |
|                                      |                                           | Sr_Kaga 2                | Adult (Cj)                                      | 2019-07-17    | LC778261            |
|                                      | Hirase, Shirakawa, Gifu (HK)              | Sr_Shirakawa             | Adult (Cj)                                      | 2019-09-25    | LC778262            |
|                                      | Notsuharu, Oita, Oita (YT)                | Sr_Oita                  | Adult (Cj)                                      | 2019-08-11    | LC778259            |

<sup>a</sup> TW, Tatsuya Wakasugi; TT, Tsutomu Tsuchida; RM, Ryo Murakami; HK, Hideo Kawase; YT, Yuji Tsutsumiuchi; HH, Hiroshi Hayakawa. <sup>b</sup> The code corresponds to the sample label in molecular phylogenetic analysis shown in Fig. 4. <sup>c</sup> Cca, *Cuscuta campestris*; Cj, *Cuscuta japonica*; Cch, *Cuscuta chinensis*.
