# Supplementary material for: New Gall-Forming Insect Model, <em>Smicronyx madaranus</em>: Critical Stages for Gall Formation, Phylogeny, and Effectiveness of Gene Functional Analysis
Source: Preprints.org preprint supplement (doi:10.20944/preprints202312.0661.v1), 2023-12-11
Supplement: Supplementary file 6 [file supplementary]

| Target gene                              | Primer name    | Direction | Sequence(5'→3') <sup>a</sup>                                 | Product size (bp) | PCR T <sub>m</sub> (°C) | References |
|------------------------------------------|----------------|-----------|--------------------------------------------------------------|-------------------|-------------------------|------------|
| <b>Primers for phylogenetic analysis</b> |                |           |                                                              |                   |                         |            |
| <i>Cytochrome c oxidase subunit I</i>    | LCO1490        | Forward   | GGTCAACAAATCATAAAGATATTGG                                    | 710               | 50                      | 60         |
|                                          | HCO2198        | Reverse   | TAAACTTCAGGGTGACCAAAAAATCA                                   |                   |                         | 60         |
| <b>Primers for quantitative PCR</b>      |                |           |                                                              |                   |                         |            |
| <i>SmMCO2A</i> and <i>SmMCO2B</i>        | SmMCO2_q803F   | Forward   | ACCATTTCATTGGCACGGTAT                                        | 204               | 62                      | This study |
|                                          | SmMCO2_q1006R  | Reverse   | GGGCGGTGTGCTAACTACGA                                         |                   |                         | This study |
| <i>Elongation factor 1 alpha</i>         | WevEF1a_640F   | Forward   | AACATGTTGGAACCTCCAC                                          | 175               | 62                      | This study |
|                                          | WevEF1a_814R   | Reverse   | CACCAATTTGTAGACATCCTG                                        |                   |                         | This study |
| <b>Primers for dsRNA</b>                 |                |           |                                                              |                   |                         |            |
| <i>SmMCO2A</i> and <i>SmMCO2B</i>        | T7_SmMCO2_276F | Forward   | GATCACT <u>TAATACGACTCACTATAGGG</u><br>TTTTCGAACGTCACCCACTG  | 593               | 62                      | This study |
|                                          | T7_SmMCO2_810R | Reverse   | GATCACT <u>TAATACGACTCACTATAGGG</u><br>GGGCGGTTGTCTAACTACGA  |                   |                         | This study |
| <i>EGFP</i>                              | T7_EGFP_284F   | Forward   | GATCACT <u>TAATACGACTCACTATAGGG</u><br>AGGAGCGCACCATCTTCTTC  | 449               | 62                      | This study |
|                                          | T7_EGFP_674R   | Reverse   | GATCACT <u>TAATACGACTCACTATAGGG</u><br>ACGAACCTCCAGCAGGACCAT |                   |                         | This study |

<sup>a</sup> The T7 promoter sequences are underlined.
