# Supplementary material for: New Gall-Forming Insect Model, <em>Smicronyx madaranus</em>: Critical Stages for Gall Formation, Phylogeny, and Effectiveness of Gene Functional Analysis
Source: Preprints.org preprint supplement (doi:10.20944/preprints202312.0661.v1), 2023-12-11
Supplement: Supplementary file 7 [file supplementary]

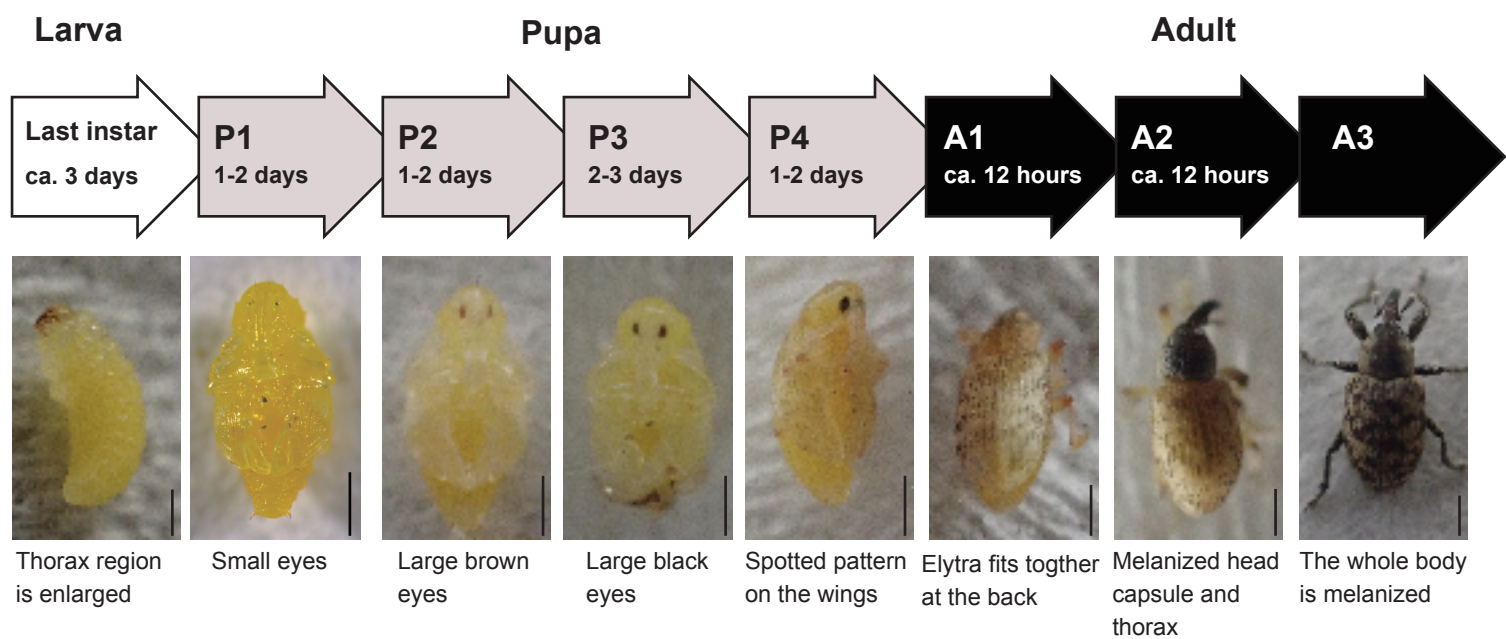

**Fig. S4.** Growth stage and body color change in *S. madaranus*. Numbers of days on the arrow indicate the approximate durations under laboratory conditions. Bars, 1 mm.
