# Supplementary material for: New Gall-Forming Insect Model, <em>Smicronyx madaranus</em>: Critical Stages for Gall Formation, Phylogeny, and Effectiveness of Gene Functional Analysis
Source: Preprints.org preprint supplement (doi:10.20944/preprints202312.0661.v1), 2023-12-11
Supplement: Supplementary file 9 [file supplementary]

Archive with 18 entries (18 files):
- FigS1.pdf
- __MACOSX/._FigS1.pdf
- FigS2.pdf
- __MACOSX/._FigS2.pdf
- FigS3.pdf
- __MACOSX/._FigS3.pdf
- FigS4.pdf
- __MACOSX/._FigS4.pdf
- MovieS1.mp4
- __MACOSX/._MovieS1.mp4
- MovieS2.mp4
- __MACOSX/._MovieS2.mp4
- Supplemental Movie Legend.pdf
- __MACOSX/._Supplemental Movie Legend.pdf
- TableS1.pdf
- __MACOSX/._TableS1.pdf
- TableS2.pdf
- __MACOSX/._TableS2.pdf
