# Supplementary material for: New Gall-Forming Insect Model, <em>Smicronyx madaranus</em>: Critical Stages for Gall Formation, Phylogeny, and Effectiveness of Gene Functional Analysis
Source: Preprints.org preprint supplement (doi:10.20944/preprints202312.0661.v1), 2023-12-11
Supplement: Supplementary file 9 [file supplementary › FigS2.pdf]

|         |                                                                               |     |
|---------|-------------------------------------------------------------------------------|-----|
| SmLac2A | MWSFRKCLPATVALLAVCLVPSVYTVRVGGGSRGATRKGDDQDAASWNSWDAIEPDFFRSEQQVLQTHPI        | 70  |
| SmLac2B | <u>MWSFRKCLPATVALLAVCLVPSVYTVRVGGGSRGATRKGDDQDAASWNSWDAIEPDFFRSEQQVLQTHPI</u> | 70  |
| SmLac2A | RGNGQVSYSGSSGGLKHKHEDFRTSPTAELRRNPSLSSPDECARACREGEPPRICYYHFTLEFYTVLGA         | 140 |
| SmLac2B | RGNGQVSYSGSSGGLKHKHEDFRTSPTAELRRNPSLSSPDECARACREGEPPRICYYHFTLEFYTVLGA         | 140 |
| SmLac2A | ACQVCTPNATNAIWSNCQCILADGVERGMLAVNRMLPGPSIQVCENDKVVIDVENHMEGMEVTIHWGIIW        | 210 |
| SmLac2B | ACQVCTPNATNAIWSNCQCILADGVERGMLAVNRMLPGPSIQVCENDKVVIDVENHMEGMEVTIHWGIIW        | 210 |
| SmLac2A | QRGSQYYDGVPPFVTQCPQQGNAFRYQWIAGNAGTHFWHAHTGLQKMDGIYGSIVVRQPPNRDPNSNLYD        | 280 |
| SmLac2B | QRGSQYYDGVPPFVTQCPQQGNAFRYQWIAGNAGTHFWHAHTGLQKMDGIYGSIVVRQPPNRDPNSNLYD        | 280 |
| SmLac2A | FDLTTHVILLSDWMHENAERFPGRLAVNTGQDPENLLINGKGQFRDPNTGFMNTNPLEIFTMTPGKRYR         | 350 |
| SmLac2B | FDLTTHVILLSDWMHENAERFPGRLAVNTGQDPENLLINGKGQFRDPNTGFMNTNPLEIFTMTPGKRYR         | 350 |
| SmLac2A | FRMINSLASVCPAQLTIQGHTLTLIATDGEPVHPVNVNTIISFSGERYDFVINADQAVGAYWIVRGLGE         | 420 |
| SmLac2B | FRMINSLASVCPAQLTIQGHTLTLIATDGEPVHPVNVNTIISFSGERYDFVINADQAVGAYWIVRGLGE         | 420 |
| SmLac2A | CGIRRVQQLGILRYYKGPYTPFTQAPTYDFGIAQGVV                                         | 490 |
| SmLac2B | CGIRRVQQLGILRYYKGPYTPFTQAPTYDFGIAQGVVS-----IV                                 | 460 |
| SmLac2A | EKPNVKIFLPFRFHVYTPQDLFAPNTYNRHLVAPNGDHVISLVDEISYMAPPAPLISQYDDTDPEQFCNG        | 560 |
| SmLac2B | VKKVMVFFSLSECDCLSIGLVEENTHN-----                                              | 488 |
| SmLac2A | DNKPANCGPNCMCTHKIDIPLNATIVEVVLVDEVQQPNLSHPFHLHGAFNVVIGRSPDQNVKKINLKHA         | 630 |
| SmLac2B | -----                                                                         | 488 |
| SmLac2A | LDLDRRGLLSRHFDLP PGKDTIAVPNNGYVIFRFRADNPGFWLFHCHFLFHIVIGMNLVLQVGTHADLPP       | 700 |
| SmLac2B | -----                                                                         | 488 |
| SmLac2A | VPLNFPTCGDHTPRINLDPTKI                                                        | 722 |
| SmLac2B | -----                                                                         | 488 |

**Fig. S2.** Alignment of putative amino acid sequences of *SmMCO2A* and *SmMCO2B*. Dashes in the sequences represent gaps introduced to optimize alignment. The number to the right indicates the position of the last amino acid in the row. Identical residues in all sequences are black-bordered; the cysteine-rich consensus region in the insect laccase protein is in red box; presumptive signal peptides predicted by SignalP 5.0 [61] are underlined in red.
